# Supplementary material for: Hyaluronate-Thiol Passivation Enhances Gold Nanoparticle Peritumoral Distribution When Administered Intratumorally in Lung Cancer
Source: MDPI journal article supplement (doi:10.3390/biomedicines9111561), 2021-10-28
Supplement: s1 [file s1]

# Supplementary Material

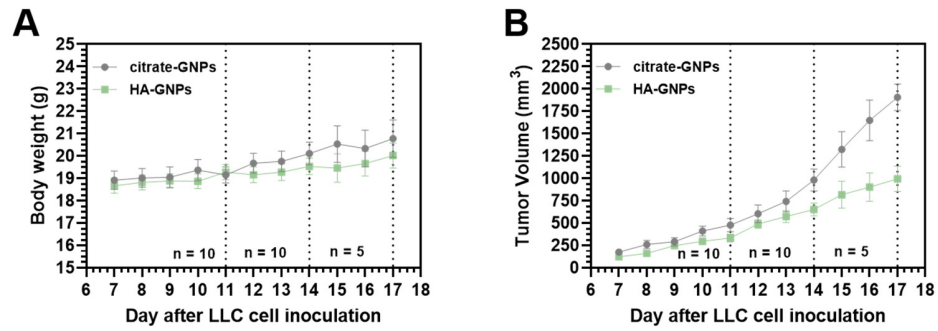

**Figure S1.** (A) Mice weight and (B) tumor volume (based on manual measurements performed using a caliper for n = 10/group up to 14 days after LLC cell inoculation and n = 5/group after day 14). Dashed lines represent particle injection (day 11), tumor harvest group 1 (day 14), and tumor harvest group 2 (day 17).
